# Supplementary material for: Circulating Innate Lymphoid Cells Exhibit Distinctive Distribution During Normal Pregnancy
Source: PubMed Central journal article supplement (PMC8907087; doi:10.1007/s43032-021-00834-6), 2022-01-05
Supplement: 43032_2021_834_MOESM1_ESM.pdf [file 43032_2021_834_MOESM1_ESM.pdf]

# Circulating Innate Lymphoid Cells Exhibit Distinctive Distribution During Normal Pregnancy

## Reproductive Sciences

### Authorship

**Yiran Zhao**<sup>a, b, †</sup>, **Yajie Zhu**<sup>a, b, †</sup>, **Xi Chen**<sup>a, b</sup>, **Hui Lin**<sup>a, b</sup>, **Ningxin Qin**<sup>a, b</sup>, **Zhiyang Zhou**<sup>a, b</sup>, **Han Liu**<sup>a, b</sup>, **Yanhui Hao**<sup>a, b</sup>, **Chengliang Zhou**<sup>a, b</sup>, **Xinmei Liu**<sup>b, c</sup>, **Li Jin**<sup>b, c</sup>, **Jianzhong Sheng**<sup>d</sup>, **Hefeng Huang**<sup>a, b, c, \*</sup>

**a**, the International Peace Maternity & Child Health Hospital, School of Medicine, Shanghai Jiao Tong University, Shanghai 200030, China

**b**, Shanghai Key Laboratory of Embryo Original Diseases, Shanghai 200030, China

**c**, Hospital of Obstetrics and Gynecology, Fudan University, Shanghai 200010, China

**d**, Department of Pathology and Pathophysiology, School of Medicine, Zhejiang University, Zhejiang 310058, China

†, These authors contributed equally to this work.

\*, Corresponding author: He-Feng Huang, huanghefg@sjtu.edu.cn, (86)021-64073897

## Supplemental information

**Table S1. Participant characteristics**

| Characteristic                                             | Non-pregnant | Early-pregnant | Late-pregnant        | <i>P</i> value |
|------------------------------------------------------------|--------------|----------------|----------------------|----------------|
| <b>N</b>                                                   | 6            | 6              | 6                    |                |
| <b>Age</b> , mean (SD), years                              | 30.17 (4.02) | 28.67 (1.37)   | 31.83 (3.06)         | 0.2254         |
| <b>Pre-pregnancy BMI</b> , mean (SD),<br>kg/m <sup>2</sup> | 20.31 (1.53) | 19.67 (0.73)   | 20.53 (2.34)         | 0.6600         |
| <b>Gravidity</b> , n (%)                                   |              |                |                      | 0.0611         |
| 0                                                          | 3 (50)       | 0 (0)          | 0 (0)                |                |
| 1                                                          | 1 (16.67)    | 1 (16.67)      | 3 (50)               |                |
| ≥2                                                         | 2 (33.33)    | 5 (83.33)      | 3 (50)               |                |
| <b>Parity</b> , n (%)                                      |              |                |                      | 0.5467         |
| 0                                                          | 3 (50)       | 2 (33.33)      | 4 (66.67)            |                |
| 1                                                          | 1 (16.67)    | 2 (33.33)      | 2 (33.33)            |                |
| ≥2                                                         | 2 (33.33)    | 2 (33.33)      | 0 (0)                |                |
| <b>Previous induced abortions</b> , n (%)                  |              |                |                      | 0.0069 **      |
| 0                                                          | 5 (40)       | 0 (44)         | 0 (64)               |                |
| 1                                                          | 0 (44)       | 3 (40)         | 3 (16)               |                |
| ≥2                                                         | 1 (16)       | 3 (16)         | 3 (20)               |                |
| <b>Gestational age</b> , median (Q1, Q3),<br>weeks         | /            | 6 (6, 6.75)    | 39.15 (38.57, 39.40) | 0.0022 **      |

Comparisons of characteristics among non-pregnant, early- pregnant and late-pregnant women were assessed using one-way ANOVA or Mann-Whitney test for continuous variables and Chi-squared tests were used for categorical variables.

*P-values* less than 0.05 ( $P < 0.05$ ) were considered significant. \*\*  $P < 0.01$ .

BMI, body mass index. SD, standard deviation. Q1, the first quartile. Q3, the third quartile.

**Table S2. Participant characteristics**

| Characteristic                           | Non-pregnant | Early-pregnant | Mid-pregnant         | Late-pregnant        | <i>P</i> value |
|------------------------------------------|--------------|----------------|----------------------|----------------------|----------------|
| N                                        | 25           | 25             | 22                   | 25                   |                |
| Age, mean (SD), years                    | 30 (3)       | 29.72 (2.31)   | 29.23 (3.13)         | 30.36 (2.66)         | 0.5610         |
| <b>Pre-pregnancy BMI,</b>                |              |                |                      |                      |                |
| mean (SD), kg/m <sup>2</sup>             | 20.12 (1.32) | 20.21 (1.48)   | 20.88 (1.66)         | 20.39 (2.20)         | 0.4420         |
| <b>Gravidity, n (%)</b>                  |              |                |                      |                      | <0.001 ***     |
| 0                                        | 7 (28)       | 0 (0)          | 0 (0)                | 0 (0)                |                |
| 1                                        | 8 (32)       | 4 (16)         | 8 (36)               | 15 (60)              |                |
| ≥2                                       | 10 (40)      | 21 (84)        | 14 (64)              | 10 (40)              |                |
| <b>Parity, n (%)</b>                     |              |                |                      |                      | 0.0018 **      |
| 0                                        | 15 (60)      | 8 (32)         | 19 (86)              | 19 (76)              |                |
| 1                                        | 4 (16)       | 9 (36)         | 3 (14)               | 5 (20)               |                |
| ≥2                                       | 6 (24)       | 8 (32)         | 0 (0)                | 1 (4)                |                |
| <b>Previous induced abortions, n (%)</b> |              |                |                      |                      | 0.2863         |
| 0                                        | 10 (40)      | 11 (44)        | 12 (54)              | 16 (64)              |                |
| 1                                        | 11 (44)      | 10 (40)        | 9 (41)               | 4 (16)               |                |
| ≥2                                       | 4 (16)       | 4 (16)         | 1 (5)                | 5 (20)               |                |
| <b>Gestational age,</b>                  |              |                |                      |                      |                |
| median (Q1, Q3), weeks /                 |              | 6 (6, 6)       | 26.22 (24.86, 26.71) | 39.14 (38.79, 39.79) | <0.001 ***     |

Comparisons of characteristics among non-pregnant, early-pregnant, mid-pregnant and late-pregnant women were assessed using Kruskal-Wallis tests or one-way ANOVA or Mann-Whitney test for continuous variables and Chi-squared tests were used for categorical variables.

*P*-values less than 0.05 ( $P < 0.05$ ) were considered significant. \*  $P < 0.05$  and \*\*\*  $P < 0.001$ .

BMI, body mass index. SD, standard deviation. Q1, the first quartile. Q3, the third quartile.

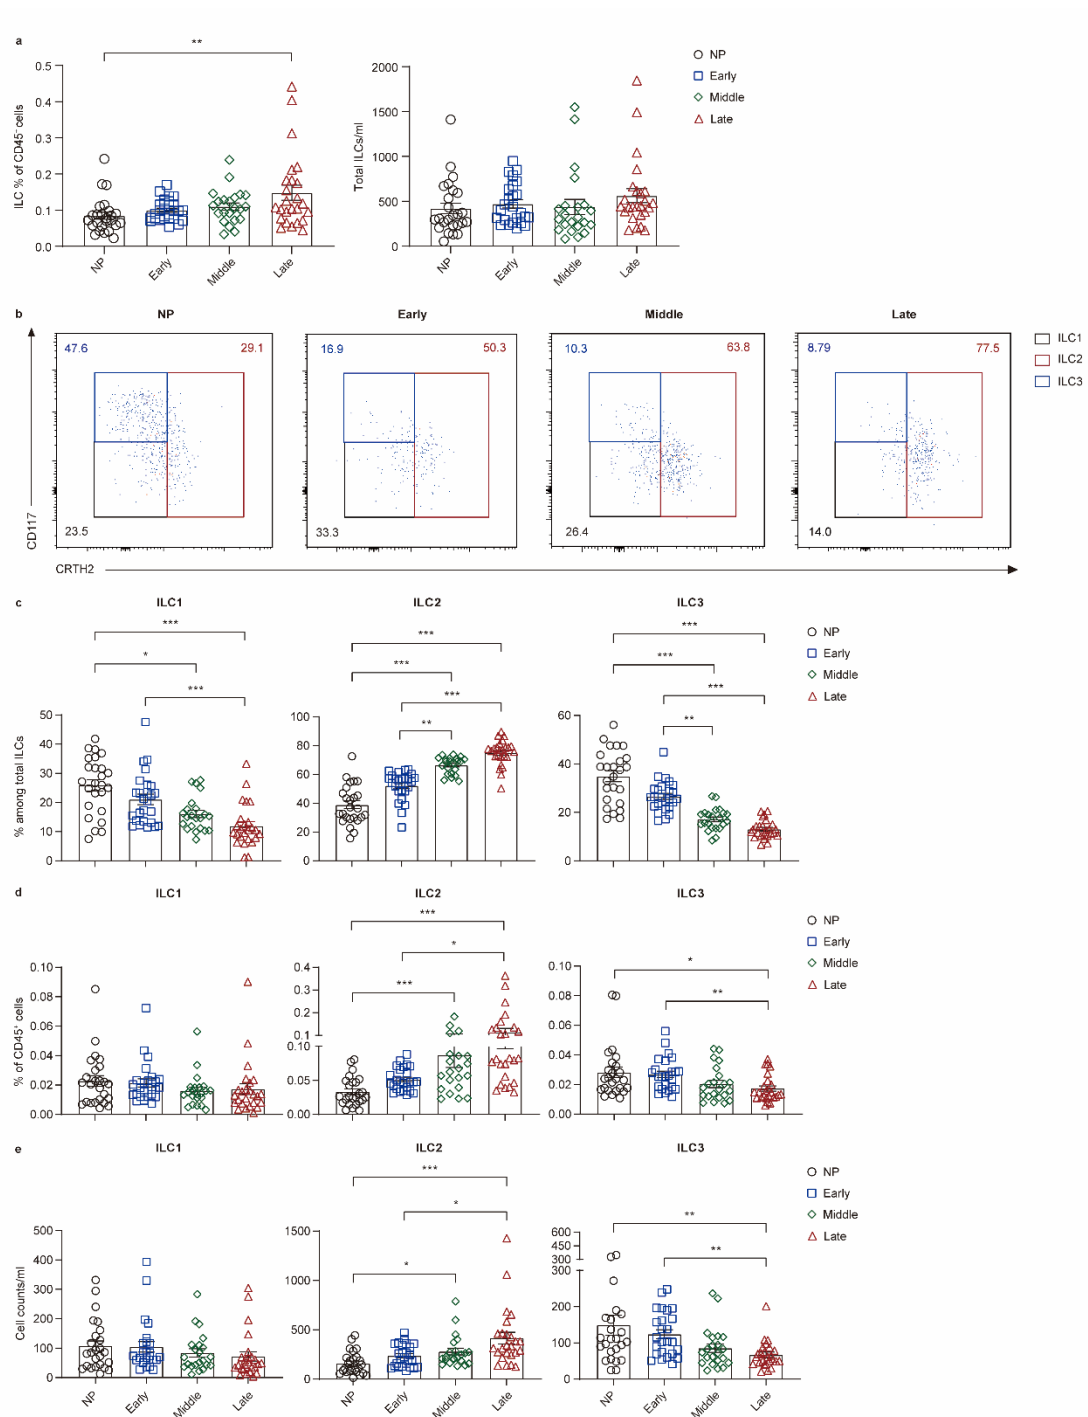

**Fig S1.** The middle trimester shows transitional change of circulating ILC subsets. **(a-e)** Analysis results for ILC subsets in peripheral blood samples of non-pregnant, early-pregnant, mid-pregnant and late-pregnant women. **(a)** Comparison of circulating ILC percentage in CD45<sup>+</sup> cells (left) and absolute counts (right) in non-pregnant, early-pregnant, mid-pregnant and late-pregnant women. **(b)** Representative flow cytometry plots are shown in which numbers indicate the frequency of flow cytometric events. Comparison of proportion of ILC subsets within total ILCs **(c)**, ILC subset percentage in CD45<sup>+</sup> cells **(d)**

and absolute counts per ml blood (**e**) in peripheral blood of non-pregnant women (black circles), early-pregnant women (blue squares), mid-pregnant women (green diamonds) and late-pregnant women (red triangles). Data are shown as means  $\pm$  SEMs and were analyzed by Kruskal-Wallis tests. Each point indicates an individual. \* $P < 0.05$ , \*\*  $P < 0.01$  and \*\*\* $P < 0.001$ .
